# Supplementary material for: Serum 5-Methyltetrahydrofolate Status Is Associated with One-Carbon Metabolism-Related Metabolite Concentrations and Enzyme Activity Indicators in Young Women
Source: MDPI journal article supplement (doi:10.3390/ijms241310993), 2023-07-01
Supplement: s1 [file s1]

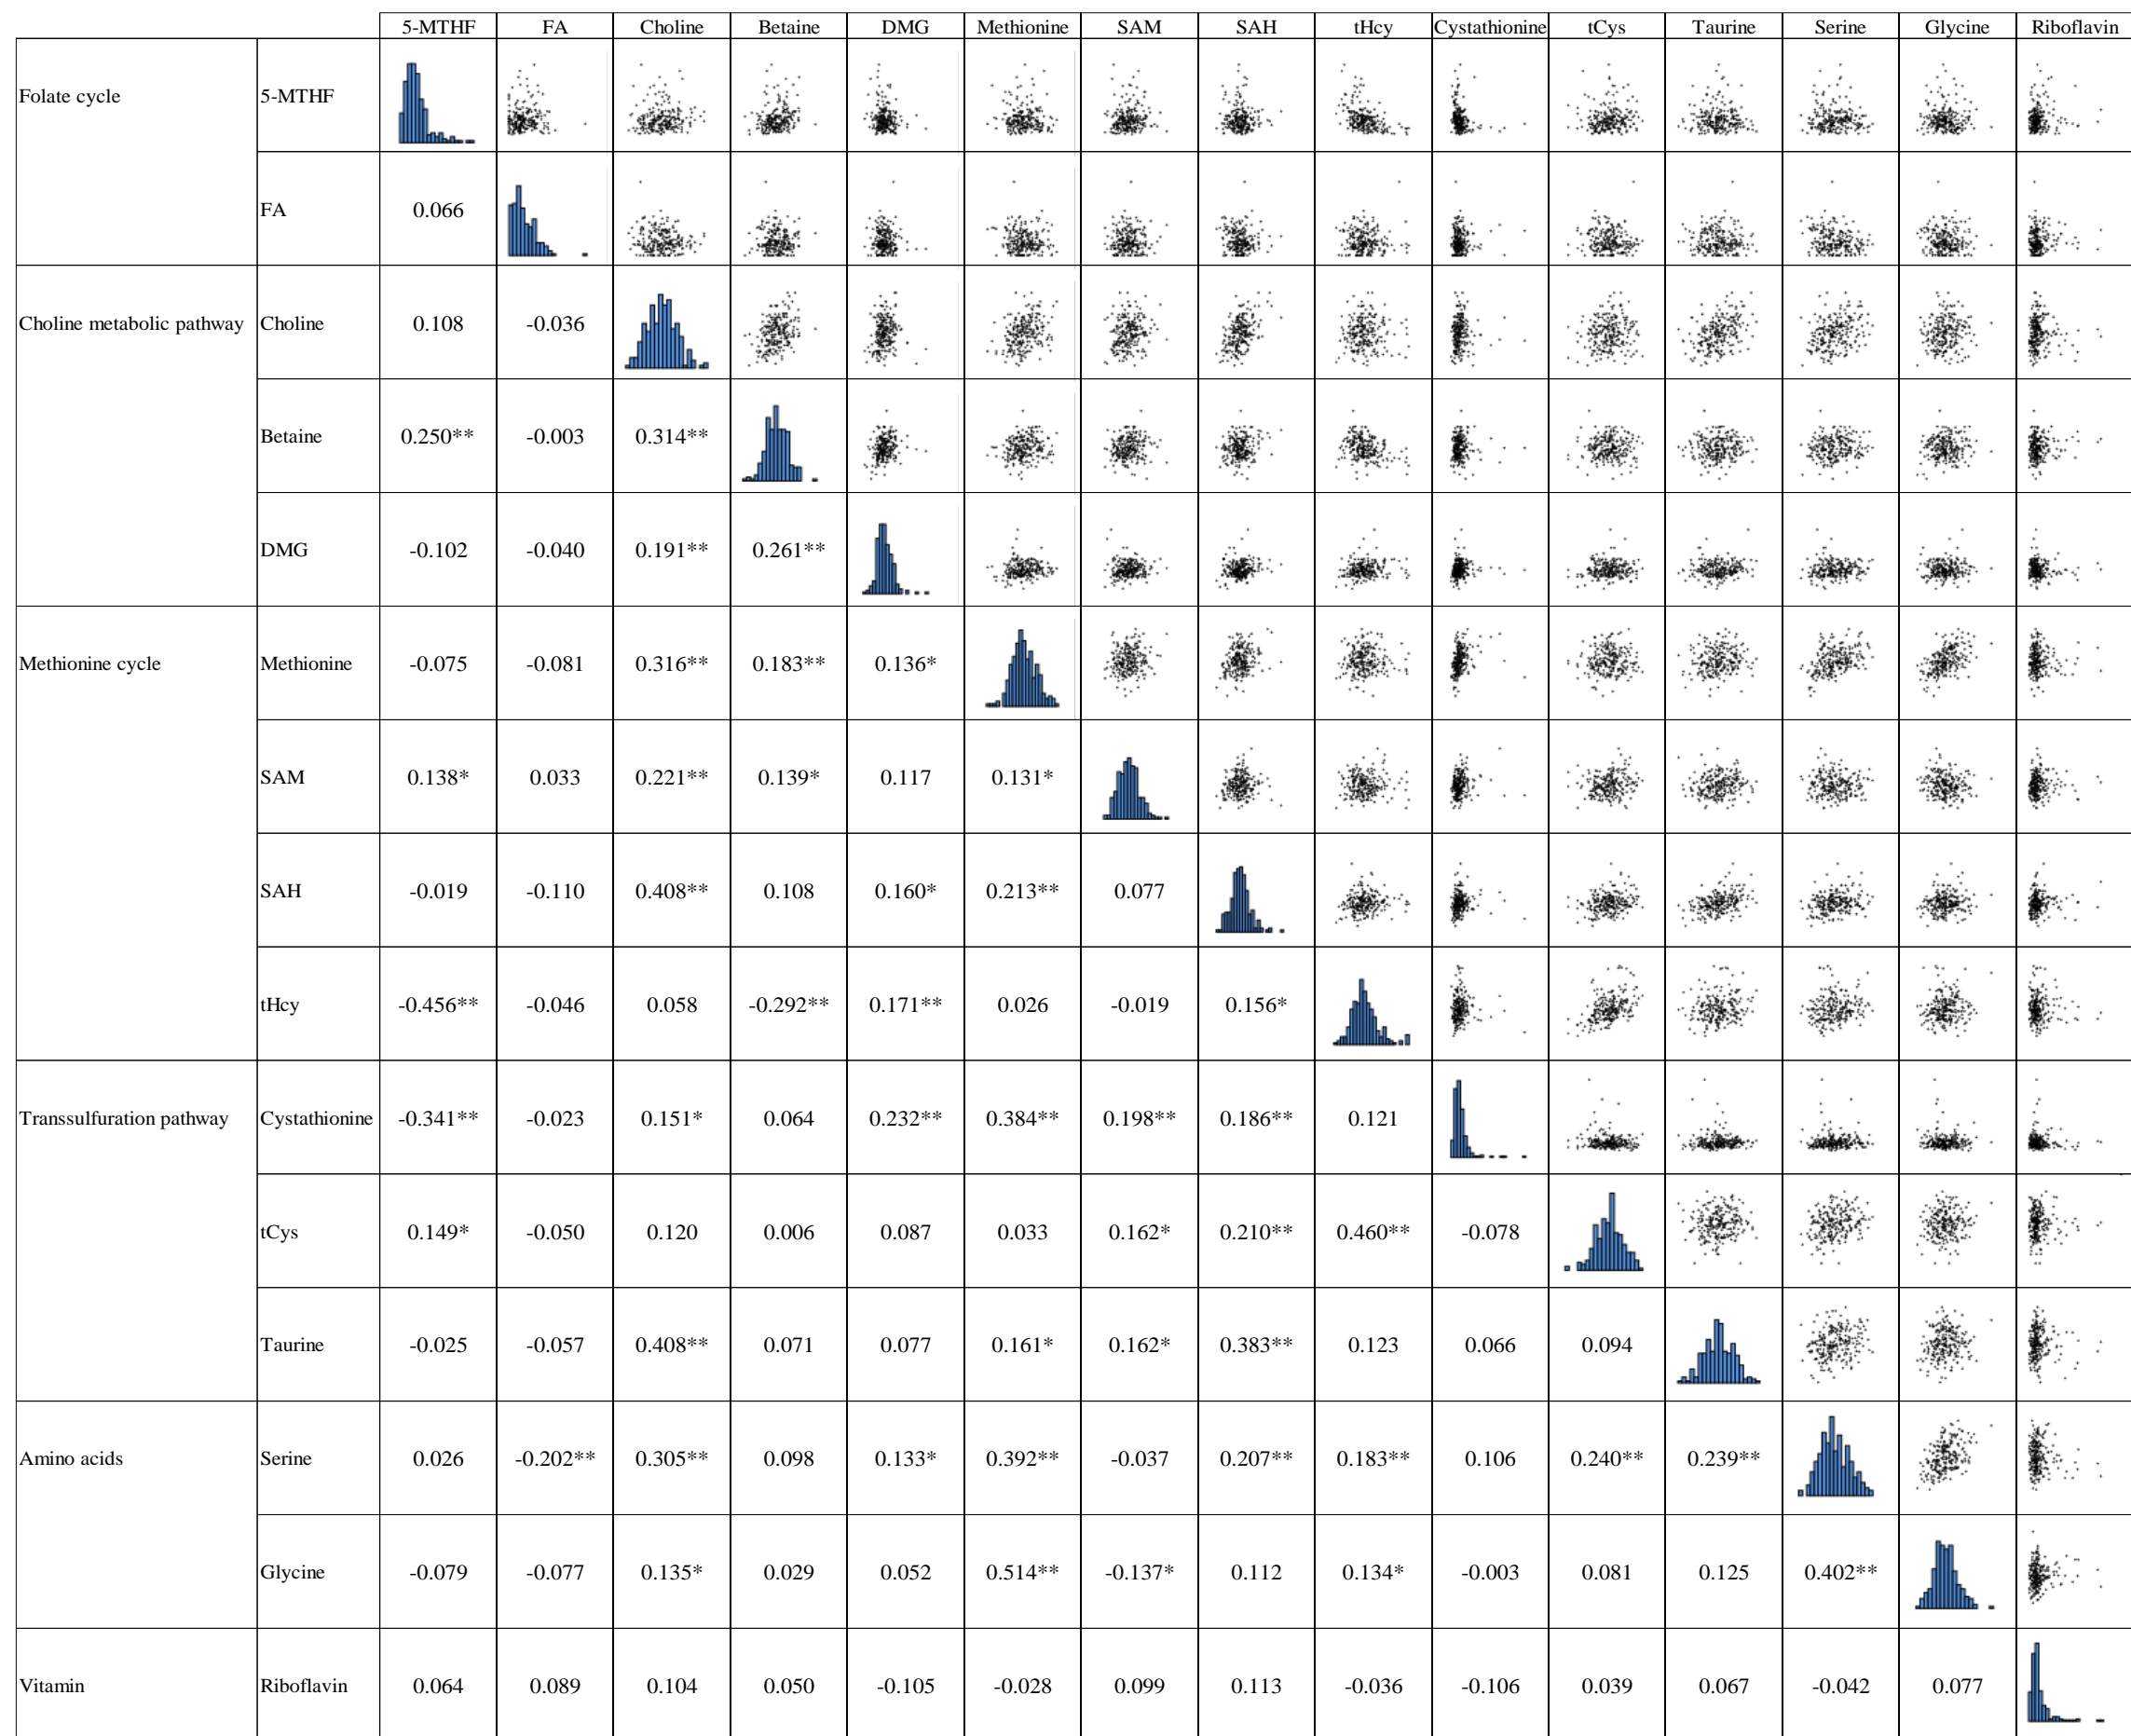

**Figure S1.** Correlation matrices between serum OCM-related metabolite concentrations.

The histogram is drawn in the shaded area.

Lower left shows spearman correlation coefficient, asterisks indicate statistical significance of correlation coefficients as follows \*\* $p < 0.01$ ; \* $p < 0.05$ .

The upper right is a scatter plot of the correlation coefficients shown in the lower left.

The sample size was  $n = 227$  and there were no missing values.

Serum homocysteic acid, pyridoxamine, and pyridoxine concentrations were below the limit of quantitation in all samples, so results are not shown.

Abbreviations, 5-MTHF; 5-methyltetrahydrofolate; FA; folic acid; DMG; dimethylglycine; SAM; S-adenosylmethionine; SAH; S-adenosylhomocysteine; tHcy; total homocysteine; tCys; total cysteine.
