# Supplementary material for: Serum 5-Methyltetrahydrofolate Status Is Associated with One-Carbon Metabolism-Related Metabolite Concentrations and Enzyme Activity Indicators in Young Women
Source: MDPI journal article supplement (doi:10.3390/ijms241310993), 2023-07-01
Supplement: s1 [file s1]

|                                        |                          |               | 5-MTHF   | FA       | Choline | Betaine  | DMG     | Methionine | SAM      | SAH     | tHcy    | Cystathionine | tCys    | Taurine | Serine  | Glycine | Riboflavin |
|----------------------------------------|--------------------------|---------------|----------|----------|---------|----------|---------|------------|----------|---------|---------|---------------|---------|---------|---------|---------|------------|
| Low 5-MTHF group<br>( <i>n</i> = 113)  | Folate cycle             | 5-MTHF        | -        |          |         |          |         |            |          |         |         |               |         |         |         |         |            |
|                                        |                          | FA            | 0.044    | -        |         |          |         |            |          |         |         |               |         |         |         |         |            |
|                                        | Choline metabolic        | Choline       | 0.171    | -0.039   | -       |          |         |            |          |         |         |               |         |         |         |         |            |
|                                        |                          | Betaine       | 0.180    | -0.042   | 0.199*  | -        |         |            |          |         |         |               |         |         |         |         |            |
|                                        |                          | DMG           | -0.016   | -0.049   | 0.116   | 0.262**  | -       |            |          |         |         |               |         |         |         |         |            |
|                                        | Methionine cycle         | Methionine    | -0.115   | -0.023   | 0.251** | 0.110    | 0.141   | -          |          |         |         |               |         |         |         |         |            |
|                                        |                          | SAM           | 0.109    | 0.160    | 0.231*  | 0.128    | 0.122   | 0.186*     | -        |         |         |               |         |         |         |         |            |
|                                        |                          | SAH           | -0.059   | -0.178   | 0.484** | -0.070   | 0.174   | 0.218*     | 0.166    | -       |         |               |         |         |         |         |            |
|                                        |                          | tHcy          | -0.355** | -0.064   | 0.004   | -0.401** | 0.058   | -0.025     | 0.030    | 0.168   | -       |               |         |         |         |         |            |
|                                        | Transsulfuration pathway | Cystathionine | -0.238*  | -0.032   | 0.069   | -0.034   | 0.167   | 0.378**    | 0.272**  | 0.139   | -0.052  | -             |         |         |         |         |            |
|                                        |                          | tCys          | 0.097    | -0.021   | 0.090   | -0.069   | -0.042  | 0.009      | 0.223*   | 0.183   | 0.519** | -0.204*       | -       |         |         |         |            |
|                                        |                          | Taurine       | 0.022    | 0.036    | 0.426** | -0.023   | 0.043   | 0.145      | 0.195*   | 0.477** | 0.131   | 0.015         | 0.135   | -       |         |         |            |
|                                        | Amino acids              | Serine        | 0.091    | -0.117   | 0.402** | 0.003    | 0.113   | 0.400**    | 0.073    | 0.266** | 0.152   | -0.042        | 0.185   | 0.295** | -       |         |            |
|                                        |                          | Glycine       | -0.148   | -0.095   | 0.131   | -0.046   | 0.089   | 0.531**    | -0.027   | 0.265** | 0.125   | -0.006        | 0.092   | 0.192*  | 0.408** | -       |            |
|                                        | Vitamin                  | Riboflavin    | -0.032   | 0.069    | 0.138   | -0.023   | -0.140  | 0.043      | 0.075    | 0.165   | 0.032   | -0.120        | 0.068   | 0.089   | 0.057   | 0.211*  | -          |
| High 5-MTHF group<br>( <i>n</i> = 114) | Folate cycle             | 5-MTHF        | -        |          |         |          |         |            |          |         |         |               |         |         |         |         |            |
|                                        |                          | FA            | 0.073    | -        |         |          |         |            |          |         |         |               |         |         |         |         |            |
|                                        | Choline metabolic        | Choline       | 0.026    | -0.037   | -       |          |         |            |          |         |         |               |         |         |         |         |            |
|                                        |                          | Betaine       | 0.156    | 0.007    | 0.403** | -        |         |            |          |         |         |               |         |         |         |         |            |
|                                        |                          | DMG           | -0.102   | -0.015   | 0.282** | 0.296**  | -       |            |          |         |         |               |         |         |         |         |            |
|                                        | Methionine cycle         | Methionine    | 0.049    | -0.128   | 0.398** | 0.286**  | 0.117   | -          |          |         |         |               |         |         |         |         |            |
|                                        |                          | SAM           | 0.023    | -0.118   | 0.182   | 0.082    | 0.100   | 0.071      | -        |         |         |               |         |         |         |         |            |
|                                        |                          | SAH           | -0.026   | -0.018   | 0.325** | 0.280**  | 0.147   | 0.219*     | -0.030   | -       |         |               |         |         |         |         |            |
|                                        |                          | tHcy          | -0.377** | -0.019   | 0.170   | -0.097   | 0.249** | 0.031      | -0.014   | 0.164   | -       |               |         |         |         |         |            |
|                                        | Transsulfuration pathway | Cystathionine | -0.222*  | 0.027    | 0.287** | 0.266**  | 0.262** | 0.371**    | 0.192*   | 0.271** | 0.115   | -             |         |         |         |         |            |
|                                        |                          | tCys          | -0.076   | -0.134   | 0.115   | 0.003    | 0.232*  | 0.097      | 0.039    | 0.229*  | 0.600** | 0.097         | -       |         |         |         |            |
|                                        |                          | Taurine       | -0.026   | -0.140   | 0.394** | 0.156    | 0.113   | 0.175      | 0.124    | 0.277** | 0.125   | 0.102         | 0.055   | -       |         |         |            |
|                                        | Amino acids              | Serine        | -0.166   | -0.288** | 0.197*  | 0.157    | 0.164   | 0.372**    | -0.178   | 0.128   | 0.285** | 0.264**       | 0.291** | 0.195*  | -       |         |            |
|                                        |                          | Glycine       | 0.023    | -0.033   | 0.149   | 0.136    | 0.023   | 0.496**    | -0.269** | -0.040  | 0.119   | -0.062        | 0.102   | 0.054   | 0.393** | -       |            |
|                                        | Vitamin                  | Riboflavin    | 0.119    | 0.122    | 0.060   | 0.080    | -0.064  | -0.103     | 0.112    | 0.067   | -0.082  | -0.098        | 0.014   | 0.058   | -0.152  | -0.050  | -          |

**Table S1.** Correlation matrices between serum OCM-related metabolite concentrations stratified by dichotomous 5-MTHF concentrations. Spearman correlation coefficient, asterisks indicate statistical significance of correlation coefficients as follows \*\*p < 0.01; \*p < 0.05. Abbreviations, 5-MTHF; 5-methyltetrahydrofolate; FA; folic acid; DMG; dimethylglycine; SAM; S -adenosylmethionine; SAH; S -adenosylhomocysteine; tHcy; total homocysteine; tCys; total cysteine. Serum homocysteic acid, pyridoxamine, and pyridoxine concentrations were below the limit of quantitation in all samples, so results are not shown.
